# Supplementary material for: Templated assembly of a pseudorotaxane of gold rectangles
Source: Royal Society of Chemistry journal article supplement (doi:10.1039/b802957a), 2008-01-01
Supplement: b802957a.pdf [file b802957a.pdf]

Supplementary Information

Templated Assembly of a Pseudorotaxane of Gold Rectangles

Yuanyuan Wang, Ronger Lin and John H. K. Yip\*

Department of Chemistry, National University of Singapore, 3 Science Drive 3,

Singapore, 117543

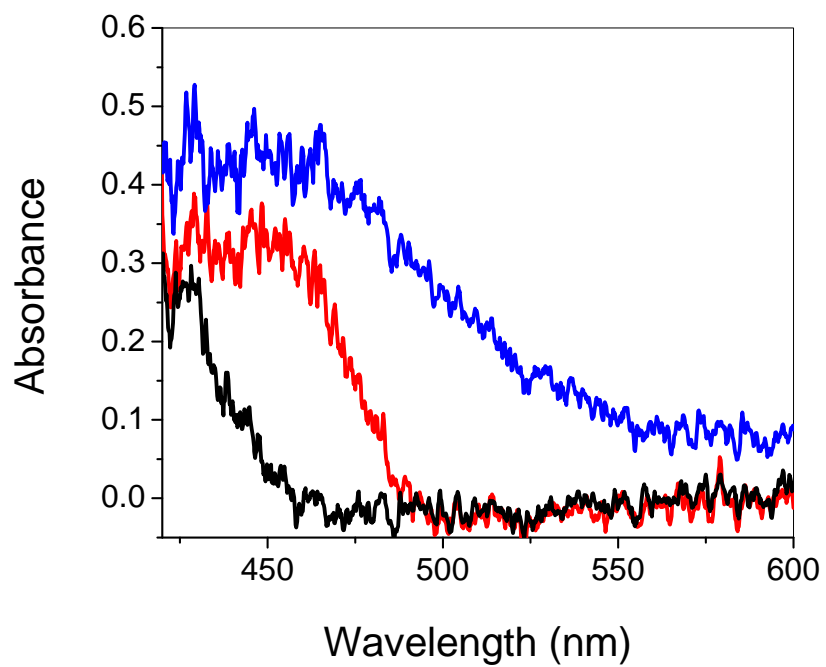

Solid state absorption spectra of **1** (red), **2** (black) and **(1)<sub>2</sub>=2** (blue)
